# Supplementary material
Source: HighWire-hosted journal article supplement (https://bmjopen.bmj.com/content/7/12/e016904)
Supplement: inline-supplementary-material-1 [file inline-supplementary-material-1.pdf]

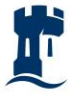

**CONSENT FORM FOR FURTHER CONTACT**  
**(Version 1.0, final Version 1.0: date 18/07/2016)**  
**Nigrosomal Iron Imaging in Parkinson's Disease (N3iPD)**

**REC ref:**

**Name of Clinical Contact Person:**

**Name of Participant:**

**Please initial box**

- I confirm that I am interested in learning more about or taking part in the study explained in the information sheet offered by either NHS Physician, NHS radiographer or research nurse. ☐
- I understand that a member of the study investigator will then contact me by phone to discuss the study further and arrange an appointment should you decide to take part. ☐
- I understand that I may return/leave the signed version of this consent via three approaches: ☐
  - 1. Return/leave it at the site to/with my NHS Physician, NHS radiographer or research nurse who offered me this form today.
  - Or 2. Return it using the enclosed stamped addressed envelope.
  - Or 3. Send it via an email to (email address: ).

**Contact details and preferred method of contact, please tick**

**Phone (landline):** .....

☐

**Phone (mobile):** .....

☐

**Email:**

☐

**Postal address:**

☐

\_\_\_\_\_  
Name of Participant

\_\_\_\_\_  
Date

\_\_\_\_\_  
Signature

\_\_\_\_\_  
Name of clinical contact person  
taking initial consent to be contacted

\_\_\_\_\_  
Date

\_\_\_\_\_  
Signature
